# Supplementary material for: Phase selectivity and tunable photophysical nature of rare earth metal–organic frameworks of EuxY1−x-PTC (H3PTC = 2,4,6-pyridine tricarboxylic acid; x = 0–1)
Source: Royal Society of Chemistry journal article supplement (doi:10.1039/d0dt03150j), 2020-01-01
Supplement: d0dt03150j1.pdf [file d0dt03150j1.pdf]

**Phase selectivity and tunable photophysical natures of rare earth metal–organic frameworks of  $\text{Eu}_x\text{Y}_{1-x}$ -PTC ( $\text{H}_3\text{PTC} = 2, 4, 6$ -pyridine tricarboxylic acid;  $x = 0-1$ )**

Xu-Sheng Gao,<sup>\*a</sup> Mei-Juan Ding,<sup>a</sup> Jin Zhang,<sup>a</sup> Li-Duo Zhao,<sup>a</sup> Xiao-Ming Ren<sup>\*a,b,c</sup>

<sup>a</sup> State Key Laboratory of Materials–Oriented Chemical Engineering and College of Chemistry & Molecular Engineering, Nanjing Tech University, Nanjing 211816, P. R. China

<sup>b</sup> College of Materials Science and Engineering, Nanjing Tech University, Nanjing 211816, P. R. China

<sup>c</sup> State Key Laboratory of Coordination Chemistry, School of Chemistry and Chemical Engineering, Nanjing University, Nanjing 210023 P. R. China

Tel: +86 25 58139527

Fax: +86 25 58139988

Email: gaoxs@njtech.edu.cn (XSG), xmren@njtech.edu.cn (XMR)

## Contents

**Table S1:** Crystallographic data and structure refinement details of  $\text{Eu}_x\text{Y}_{1-x}$ -PTC

**Table S2:** Selected bond length (Å) and bond angle (°) for Y-PTC and Eu-PTC.

**Table S3:** Crystallographic data and structure refinement details of  $\text{Eu}_x\text{Y}_{1-x}$ -PTC (herein, the Eu and Y site occupation factors are determined by the ICP)

**Figure S1:** The connection of Eu1 (purple) and Eu2 (green) in Eu-PTC.

**Figure S2:** Molar ratio of  $\text{Eu}:\text{Y} = x:(1-x)$  in  $\text{Eu}_x\text{Y}_{1-x}$ -PTC. (Samples 1–11 represent  $x = 0.82$ – $0.013$ )

**Figure S3:** IR spectra of (a) Y-PTC (b) Eu-PTC (c) Y-PTC and Eu-PTC (d)  $\text{Eu}_x\text{Y}_{1-x}$ -PTC ( $x = 0.013$ – $1$ )

**Figure S4:** TG and DTA curves of (a) Y-PTC (b) Eu-PTC (c, d)  $\text{Eu}_x\text{Y}_{1-x}$ -PTC ( $x = 0.013$ – $0.82$ )

**Figure S5:** The powder X-ray diffraction patterns for (a) Y-PTC and (b) Eu-PTC

**Figure S6:** Solid-state UV-vis diffuse reflectance spectra of  $\text{Eu}_x\text{Y}_{1-x}$ -PTC ( $x = 0.013$ – $0.82$ ).

**Figure S7:** The fine structure of solid-state emission spectra for Y-PTC at 10K excited under UV light at 326 nm.

**Figure S8:**  $\text{Eu}_x\text{Y}_{1-x}$ -PTC ( $x = 0.013$ – $1$ ) under optimal excitation light with  $\lambda = 301$  nm at room temperature.

**Figure S9:** Images of crystals under UV light (300–380 nm) for  $\text{Eu}_x\text{Y}_{1-x}$ -PTC ( $x = 0.395$ – $1$ ).

**Figure S10:** Photographs of  $\text{Eu}_x\text{Y}_{1-x}$ -PTC under UV light (upper row,  $\lambda_{\text{ex}} = 254$  nm and lower row,  $\lambda_{\text{ex}} = 365$  nm) showing different colors owing to the emission spectra being dependent on excited wavelength.

**Figure S11:** Emission decay of all MOFs obtained at room temperature, where the red lines and the black squares represent the fitting curves and the experimental data, respectively.

**Figure S12:** Excitation and emission spectra of (a) Y-PTC (b) Eu-PTC at ambient condition, Excitation spectrum of  $\text{Eu}_{0.06}\text{Y}_{0.94}$ -PTC (c) examined at 443 nm (d) examined at 618 nm.

**Table S1:** Crystallographic data and structure refinement details of Eu<sub>x</sub>Y<sub>1-x</sub>-PTC

| compound                            | Eu <sub>0.82</sub> Y <sub>0.18</sub> -PTC                                                           | Eu <sub>0.745</sub> Y <sub>0.255</sub> -PTC                                                         | Eu <sub>0.66</sub> Y <sub>0.34</sub> -PTC                                                           |
|-------------------------------------|-----------------------------------------------------------------------------------------------------|-----------------------------------------------------------------------------------------------------|-----------------------------------------------------------------------------------------------------|
| empirical formula                   | C <sub>16</sub> H <sub>16</sub> Eu <sub>1.64</sub> N <sub>2</sub> O <sub>18</sub> Y <sub>0.36</sub> | C <sub>16</sub> H <sub>16</sub> Eu <sub>1.49</sub> N <sub>2</sub> O <sub>18</sub> Y <sub>0.51</sub> | C <sub>16</sub> H <sub>16</sub> Eu <sub>1.32</sub> N <sub>2</sub> O <sub>18</sub> Y <sub>0.68</sub> |
| CCDC deposit no.                    | 1968497                                                                                             | 1968494                                                                                             | 1968493                                                                                             |
| $F_w$ (g mol <sup>-1</sup> )        | 805.61                                                                                              | 796.09                                                                                              | 785.43                                                                                              |
| crystal system                      | monoclinic                                                                                          | monoclinic                                                                                          | monoclinic                                                                                          |
| space group                         | $P2_1/n$                                                                                            | $P2_1/n$                                                                                            | $P2_1/n$                                                                                            |
| crystal color                       | colorless                                                                                           | colorless                                                                                           | colorless                                                                                           |
| crystal size                        | 0.3×0.2×0.1                                                                                         | 0.3×0.2×0.1                                                                                         | 0.3×0.2×0.1                                                                                         |
| temperature (K)                     | 303(2)                                                                                              | 306(2)                                                                                              | 303(2)                                                                                              |
| Wavelength (Å)                      | 0.71073                                                                                             | 0.71073                                                                                             | 0.71073                                                                                             |
| $a$ (Å)                             | 18.4125(10)                                                                                         | 18.3931(12)                                                                                         | 18.3854(4)                                                                                          |
| $b$ (Å)                             | 6.9080(3)                                                                                           | 6.9087(5)                                                                                           | 6.9070(2)                                                                                           |
| $c$ (Å)                             | 18.5353(10)                                                                                         | 18.5133(12)                                                                                         | 18.5103(5)                                                                                          |
| $\alpha$ (deg)                      | 90                                                                                                  | 90                                                                                                  | 90                                                                                                  |
| $\beta$ (deg)                       | 112.0386(18)                                                                                        | 112.056(2)                                                                                          | 112.0906(8)                                                                                         |
| $\gamma$ (deg)                      | 90                                                                                                  | 90                                                                                                  | 90                                                                                                  |
| $V$ (Å <sup>3</sup> )               | 2185.31(19)                                                                                         | 2180.4(3)                                                                                           | 2178.03(10)                                                                                         |
| $Z$                                 | 4                                                                                                   | 4                                                                                                   | 4                                                                                                   |
| $D_c$ (g cm <sup>-3</sup> )         | 2.449                                                                                               | 2.425                                                                                               | 2.395                                                                                               |
| $F(000)$                            | 1549.0                                                                                              | 1535.0                                                                                              | 1518.8                                                                                              |
| $\theta_{\min, \max}$ (°)           | 3.18-27.49                                                                                          | 3.18-27.49                                                                                          | 3.18-27.48                                                                                          |
| GOF                                 | 1.178                                                                                               | 1.104                                                                                               | 1.158                                                                                               |
| $R_1, {}^a wR_2^b [I > 2\sigma(I)]$ | 0.0157, 0.0336                                                                                      | 0.0160, 0.0361                                                                                      | 0.0150, 0.0316                                                                                      |

$${}^a R_1 = \frac{\sum ||F_o| - |F_c||}{\sum |F_o|}, {}^b wR_2 = \left\{ \frac{\sum [w(F_o^2 - F_c^2)^2]}{\sum [w(F_o^2)^2]} \right\}^{1/2}$$

**Continue Table S1**

| compound                            | Eu <sub>0.55</sub> Y <sub>0.45</sub> -PTC                                                           | Eu <sub>0.49</sub> Y <sub>0.51</sub> -PTC                                                           | Eu <sub>0.395</sub> Y <sub>0.605</sub> -PTC                                                         |
|-------------------------------------|-----------------------------------------------------------------------------------------------------|-----------------------------------------------------------------------------------------------------|-----------------------------------------------------------------------------------------------------|
| empirical formula                   | C <sub>16</sub> H <sub>16</sub> Eu <sub>1.10</sub> N <sub>2</sub> O <sub>18</sub> Y <sub>0.90</sub> | C <sub>16</sub> H <sub>16</sub> Eu <sub>0.98</sub> N <sub>2</sub> O <sub>18</sub> Y <sub>1.02</sub> | C <sub>16</sub> H <sub>16</sub> Eu <sub>0.79</sub> N <sub>2</sub> O <sub>18</sub> Y <sub>1.21</sub> |
| CCDC deposit no.                    | 1968487                                                                                             | 1968473                                                                                             | 1968463                                                                                             |
| $F_w$ (g mol <sup>-1</sup> )        | 771.30                                                                                              | 763.93                                                                                              | 751.66                                                                                              |
| crystal system                      | monoclinic                                                                                          | monoclinic                                                                                          | monoclinic                                                                                          |
| space group                         | $P2_1/n$                                                                                            | $P2_1/n$                                                                                            | $P2_1/n$                                                                                            |
| crystal color                       | colorless                                                                                           | colorless                                                                                           | colorless                                                                                           |
| crystal size                        | 0.3×0.2×0.1                                                                                         | 0.3 × 0.2 × 0.1                                                                                     | 0.3 × 0.2 × 0.1                                                                                     |
| temperature (K)                     | 301(2)                                                                                              | 273(2)                                                                                              | 301(2)                                                                                              |
| Wavelength (Å)                      | 0.71073                                                                                             | 0.71073                                                                                             | 0.71073                                                                                             |
| $a$ (Å)                             | 18.356(3)                                                                                           | 18.3578(7)                                                                                          | 18.3663(7)                                                                                          |
| $b$ (Å)                             | 6.8895(13)                                                                                          | 6.9013(3)                                                                                           | 6.8962(3)                                                                                           |
| $c$ (Å)                             | 18.502(3)                                                                                           | 18.4646(8)                                                                                          | 18.4474(7)                                                                                          |
| $\alpha$ (deg)                      | 90                                                                                                  | 90                                                                                                  | 90                                                                                                  |
| $\beta$ (deg)                       | 112.176(7)                                                                                          | 112.1571(11)                                                                                        | 112.1762(14)                                                                                        |
| $\gamma$ (deg)                      | 90                                                                                                  | 90                                                                                                  | 90                                                                                                  |
| $V$ (Å <sup>3</sup> )               | 2166.8(7)                                                                                           | 2166.58(16)                                                                                         | 2163.67(15)                                                                                         |
| $Z$                                 | 4                                                                                                   | 4                                                                                                   | 4                                                                                                   |
| $D_c$ (g cm <sup>-3</sup> )         | 2.364                                                                                               | 2.342                                                                                               | 2.307                                                                                               |
| $F(000)$                            | 1497.5                                                                                              | 1486.0                                                                                              | 1467.4                                                                                              |
| $\theta_{\min, \max}$ (°)           | 3.18-27.55                                                                                          | 1.98-27.56                                                                                          | 3.18-27.51                                                                                          |
| GOF                                 | 1.130                                                                                               | 1.047                                                                                               | 1.151                                                                                               |
| $R_1, {}^a wR_2^b [I > 2\sigma(I)]$ | 0.0216, 0.0410                                                                                      | 0.0208, 0.0431                                                                                      | 0.0149, 0.0326                                                                                      |

$${}^a R_1 = \frac{\sum ||F_o| - |F_c||}{\sum |F_o|}, {}^b wR_2 = \left\{ \frac{\sum [w(F_o^2 - F_c^2)^2]}{\sum [w(F_o^2)^2]} \right\}^{1/2}$$

**Continue Table S1**

| compound                            | Eu <sub>0.285</sub> Y <sub>0.715</sub> -PTC                                                         | Eu <sub>0.195</sub> Y <sub>0.805</sub> -PTC                                                         | Eu <sub>0.09</sub> Y <sub>0.91</sub> -PTC                                                           |
|-------------------------------------|-----------------------------------------------------------------------------------------------------|-----------------------------------------------------------------------------------------------------|-----------------------------------------------------------------------------------------------------|
| empirical formula                   | C <sub>16</sub> H <sub>16</sub> Eu <sub>0.57</sub> N <sub>2</sub> O <sub>18</sub> Y <sub>1.43</sub> | C <sub>16</sub> H <sub>16</sub> Eu <sub>0.39</sub> N <sub>2</sub> O <sub>18</sub> Y <sub>1.61</sub> | C <sub>16</sub> H <sub>16</sub> Eu <sub>0.18</sub> N <sub>2</sub> O <sub>18</sub> Y <sub>1.82</sub> |
| CCDC deposit no.                    | 1968449                                                                                             | 1968480                                                                                             | 1968448                                                                                             |
| $F_w$ (g mol <sup>-1</sup> )        | 737.88                                                                                              | 726.72                                                                                              | 713.35                                                                                              |
| crystal system                      | monoclinic                                                                                          | monoclinic                                                                                          | monoclinic                                                                                          |
| space group                         | $P2_1/n$                                                                                            | $P2_1/n$                                                                                            | $P2_1/n$                                                                                            |
| crystal color                       | colorless                                                                                           | colorless                                                                                           | colorless                                                                                           |
| crystal size                        | 0.3×0.2×0.1                                                                                         | 0.3 × 0.2 × 0.1                                                                                     | 0.3 × 0.2 × 0.1                                                                                     |
| temperature (K)                     | 301(2)                                                                                              | 273(2)                                                                                              | 301(2)                                                                                              |
| Wavelength (Å)                      | 0.71073                                                                                             | 0.71073                                                                                             | 0.71073                                                                                             |
| $a$ (Å)                             | 18.329(4)                                                                                           | 18.3456(16)                                                                                         | 18.3352(9)                                                                                          |
| $b$ (Å)                             | 6.8971(18)                                                                                          | 6.8867(6)                                                                                           | 6.8838(4)                                                                                           |
| $c$ (Å)                             | 18.442(4)                                                                                           | 18.3909(16)                                                                                         | 18.3844(9)                                                                                          |
| $\alpha$ (deg)                      | 90                                                                                                  | 90                                                                                                  | 90                                                                                                  |
| $\beta$ (deg)                       | 112.200(9)                                                                                          | 112.165(3)                                                                                          | 112.22                                                                                              |
| $\gamma$ (deg)                      | 90                                                                                                  | 90                                                                                                  | 90                                                                                                  |
| $V$ (Å <sup>3</sup> )               | 2158.6(8)                                                                                           | 2151.8(3)                                                                                           | 2148.16(19)                                                                                         |
| $Z$                                 | 4                                                                                                   | 4                                                                                                   | 4                                                                                                   |
| $D_c$ (g cm <sup>-3</sup> )         | 2.270                                                                                               | 2.243                                                                                               | 2.206                                                                                               |
| $F(000)$                            | 1446.4                                                                                              | 1429.0                                                                                              | 1409.0                                                                                              |
| $\theta_{\min, \max}$ (°)           | 3.18-27.49                                                                                          | 1.99-27.55                                                                                          | 3.19-27.50                                                                                          |
| GOF                                 | 1.088                                                                                               | 1.083                                                                                               | 1.074                                                                                               |
| $R_1, {}^a wR_2^b [I > 2\sigma(I)]$ | 0.0230, 0.0423                                                                                      | 0.0231, 0.0494                                                                                      | 0.0197, 0.0433                                                                                      |

<sup>a</sup>  $R_1 = \sum ||F_o| - |F_c|| / \sum |F_o|$ . <sup>b</sup>  $wR_2 = \{ \sum [w(F_o^2 - F_c^2)^2] / \sum [w(F_o^2)^2] \}^{1/2}$

**Table S2:** Selected bond length (Å) and bond angle (°) for Y-PTC and Eu-PTC

| Y-PTC           |            |            |            |
|-----------------|------------|------------|------------|
| Bond length / Å |            |            |            |
| Y1-N2           | 2.496(4)   | Y1-O3      | 2.376(4)   |
| Y1-O5           | 2.405(4)   | Y1-O7      | 2.346(4)   |
| Y1-O10          | 2.274(4)   | Y1-O11     | 2.349(4)   |
| Y1-O12          | 2.292(4)   | Y1-O13     | 2.277(4)   |
| Y2-N1           | 2.453(5)   | Y2-O1      | 2.373(4)   |
| Y2-O2           | 2.316(4)   | Y2-O3      | 2.453(4)   |
| Y2-O4           | 2.466(4)   | Y2-O6      | 2.286(4)   |
| Y2-O8           | 2.298(4)   | Y2-O9      | 2.319(4)   |
| Bond angles / ° |            |            |            |
| O3-Y1-N2        | 64.02(13)  | O3-Y1-O5   | 127.90(12) |
| O5-Y1-N2        | 64.12(13)  | O7-Y1-N2   | 126.93(15) |
| O7-Y1-O3        | 73.77(14)  | O7-Y1-O5   | 147.82(14) |
| O7-Y1-O11       | 133.74(16) | O10-Y1-N2  | 73.86(15)  |
| O10-Y1-O3       | 90.84(14)  | O10-Y1-O5  | 79.69(14)  |
| O10-Y1-O7       | 76.22(15)  | O10-Y1-O11 | 143.87(16) |
| O10-Y1-O12      | 144.97(17) | O10-Y1-O13 | 79.89(17)  |
| O11-Y1-N2       | 71.18(15)  | O11-Y1-O3  | 82.01(13)  |
| O11-Y1-O5       | 77.21(14)  | O12-Y1-N2  | 139.09(16) |
| O12-Y1-O3       | 95.41(15)  | O12-Y1-O5  | 121.08(16) |
| O12-Y1-O7       | 72.61(17)  | O12-Y1-O11 | 71.15(17)  |
| O13-Y1-N2       | 131.34(15) | O13-Y1-O3  | 156.98(15) |
| O13-Y1-O5       | 71.42(14)  | O13-Y1-O7  | 83.53(15)  |
| O13-Y1-O11      | 117.60(16) | O13-Y1-O12 | 81.10(17)  |
| O3-Y2-N1        | 118.66(14) | N1-Y2-O4   | 71.63(14)  |
| O1-Y2-N1        | 64.70(14)  | O1-Y2-O3   | 119.59(13) |
| O1-Y2-O4        | 79.06(14)  | O2-Y2-N1   | 65.85(15)  |
| O2-Y2-O1        | 130.36(14) | O2-Y2-O3   | 81.19(14)  |
| O2-Y2-O4        | 81.87(15)  | O2-Y2-O9   | 88.11(16)  |
| O3-Y2-O4        | 52.89(12)  | O6-Y2-N1   | 140.64(16) |
| O6-Y2-O1        | 142.77(15) | O6-Y2-O2   | 82.78(15)  |
| O6-Y2-O3        | 76.50(13)  | O6-Y2-O4   | 128.70(13) |
| O6-Y2-O8        | 76.38(15)  | O6-Y2-O9   | 79.01(15)  |
| O8-Y2-N1        | 138.71(15) | O8-Y2-O1   | 74.02(14)  |
| O8-Y2-O2        | 155.01(15) | O8-Y2-O3   | 80.67(15)  |
| O8-Y2-O4        | 100.48(16) | O8-Y2-O9   | 101.48(16) |
| O9-Y2-N1        | 76.90(16)  | O9-Y2-O1   | 85.03(15)  |
| O9-Y2-O3        | 154.29(15) | O9-Y2-O4   | 148.39(15) |
| Eu-PTC          |            |            |            |
| Bond length / Å |            |            |            |
| Eu1-O1          | 2.4102(17) | Eu1-O2#2   | 2.5179(16) |

|                                                                                                                   |            |                |            |
|-------------------------------------------------------------------------------------------------------------------|------------|----------------|------------|
| Eu1-O3                                                                                                            | 2.3945(17) | Eu1-O9#1       | 2.4988(17) |
| Eu1-O10#1                                                                                                         | 2.5802(18) | Eu1-O13        | 2.4403(19) |
| Eu1-O14                                                                                                           | 2.446(2)   | Eu1-O15        | 2.418(2)   |
| Eu1-N1                                                                                                            | 2.5473(19) | Eu2-O5         | 2.3713(17) |
| Eu2-O6#3                                                                                                          | 2.4014(17) | Eu2-O7         | 2.3472(17) |
| Eu2-O8#4                                                                                                          | 2.4125(17) | Eu2-O12#4      | 2.4040(17) |
| Eu2-O16                                                                                                           | 2.3818(19) | Eu2-O17        | 2.4416(19) |
| Eu2-N2#4                                                                                                          | 2.515(2)   |                |            |
| Bond angles / °                                                                                                   |            |                |            |
| O1-Eu1-O2#2                                                                                                       | 72.68(6)   | O1-Eu1-O9#1    | 101.49(6)  |
| O1-Eu1-O10#1                                                                                                      | 139.11(6)  | O1-Eu1-O13     | 86.58(7)   |
| O1-Eu1-O14                                                                                                        | 139.58(7)  | O1-Eu1-O15     | 73.68(7)   |
| O1-Eu1-N1                                                                                                         | 63.03(6)   | O2#2-Eu1-O10#1 | 114.84(6)  |
| O2#2-Eu1-N1                                                                                                       | 123.67(6)  | O3-Eu1-O1      | 126.13(6)  |
| O3-Eu1-O2#2                                                                                                       | 147.01(6)  | O3-Eu1-O9#1    | 121.90(6)  |
| O3-Eu1-O10#1                                                                                                      | 70.65(6)   | O3-Eu1-O13     | 80.80(6)   |
| O3-Eu1-O14                                                                                                        | 85.50(7)   | O3-Eu1-O15     | 85.15(7)   |
| O3-Eu1-N1                                                                                                         | 63.28(6)   | O9#1-Eu1-O2#2  | 71.26(6)   |
| O9#1-Eu1-O10#1                                                                                                    | 51.25(6)   | O9#1-Eu1-N1    | 147.76(6)  |
| O13-Eu1-O2#2                                                                                                      | 73.08(6)   | O13-Eu1-O9#1   | 138.92(7)  |
| O13-Eu1-O10#1                                                                                                     | 134.30(6)  | O13-Eu1-O14    | 73.28(7)   |
| O13-Eu1-N1                                                                                                        | 71.35(6)   | O14-Eu1-O2#2   | 68.10(7)   |
| O14-Eu1-O9#1                                                                                                      | 75.01(7)   | O14-Eu1-O10#1  | 69.67(7)   |
| O14-Eu1-N1                                                                                                        | 135.66(7)  | O15-Eu1-O2#2   | 127.81(7)  |
| O15-Eu1-O9#1                                                                                                      | 77.82(7)   | O15-Eu1-O10#1  | 71.08(7)   |
| O15-Eu1-O13                                                                                                       | 142.01(7)  | O15-Eu1-O14    | 140.57(8)  |
| O15-Eu1-N1                                                                                                        | 70.79(7)   | N1-Eu1-O10#1   | 121.34(6)  |
| O5-Eu2-O6#3                                                                                                       | 73.54(6)   | O5-Eu2-O8#4    | 137.70(6)  |
| O5-Eu2-O12#4                                                                                                      | 82.93(6)   | O5-Eu2-O16     | 79.62(7)   |
| O5-Eu2-O17                                                                                                        | 70.73(7)   | O5-Eu2-N2#4    | 136.36(6)  |
| O6#3-Eu2-O8#4                                                                                                     | 80.00(6)   | O6#3-Eu2-O12#4 | 86.41(6)   |
| O6#3-Eu2-O17                                                                                                      | 143.39(7)  | O6#3-Eu2-N2#4  | 77.02(6)   |
| O7-Eu2-O5                                                                                                         | 137.55(6)  | O7-Eu2-O6#3    | 148.31(6)  |
| O7-Eu2-O8#4                                                                                                       | 76.64(7)   | O7-Eu2-O12#4   | 91.35(6)   |
| O7-Eu2-O16                                                                                                        | 94.02(7)   | O7-Eu2-O17     | 66.82(7)   |
| O7-Eu2-N2#4                                                                                                       | 73.74(6)   | O8#4-Eu2-O17   | 133.60(7)  |
| O8#4-Eu2-N2#4                                                                                                     | 64.54(6)   | O12#4-Eu2-O8#4 | 128.08(6)  |
| O12#4-Eu2-O17                                                                                                     | 81.61(7)   | O12#4-Eu2-N2#4 | 63.60(6)   |
| O16-Eu2-O6#3                                                                                                      | 99.15(7)   | O16-Eu2-O8#4   | 72.64(7)   |
| O16-Eu2-O12#4                                                                                                     | 159.28(7)  | O16-Eu2-O17    | 82.16(8)   |
| O16-Eu2-N2#4                                                                                                      | 137.06(7)  | O17-Eu2-N2#4   | 125.97(7)  |
| Symmetry codes: #1 = 1/2-x, 1/2+y, 3/2-z; #2 = 1/2-x, -1/2+y, 3/2-z; #3 = 1-x, 2-y, 1-z; #4 = 1/2-x, 1/2+y, 1/2-z |            |                |            |

**Table S3:** Crystallographic data and structure refinement details of  $\text{Eu}_x\text{Y}_{1-x}\text{-PTC}$  (herein, the Eu and Y site occupation factors are determined by the ICP)

| compound                                                                                                   | $\text{Eu}_{0.835}\text{Y}_{0.165}\text{-PTC}$                                     | $\text{Eu}_{0.745}\text{Y}_{0.255}\text{-PTC}$                                     | $\text{Eu}_{0.645}\text{Y}_{0.355}\text{-PTC}$                                     |
|------------------------------------------------------------------------------------------------------------|------------------------------------------------------------------------------------|------------------------------------------------------------------------------------|------------------------------------------------------------------------------------|
| empirical formula                                                                                          | $\text{C}_{16}\text{H}_{16}\text{Eu}_{1.67}\text{N}_2\text{O}_{18}\text{Y}_{0.33}$ | $\text{C}_{16}\text{H}_{16}\text{Eu}_{1.49}\text{N}_2\text{O}_{18}\text{Y}_{0.51}$ | $\text{C}_{16}\text{H}_{16}\text{Eu}_{1.29}\text{N}_2\text{O}_{18}\text{Y}_{0.71}$ |
| $F_w$ (g mol <sup>-1</sup> )                                                                               | 807.42                                                                             | 796.07                                                                             | 783.46                                                                             |
| crystal system                                                                                             | monoclinic                                                                         | monoclinic                                                                         | monoclinic                                                                         |
| space group                                                                                                | $P2_1/n$                                                                           | $P2_1/n$                                                                           | $P2_1/n$                                                                           |
| crystal color                                                                                              | colorless                                                                          | colorless                                                                          | colorless                                                                          |
| crystal size                                                                                               | 0.3×0.2×0.1                                                                        | 0.3×0.2×0.1                                                                        | 0.3×0.2×0.1                                                                        |
| temperature (K)                                                                                            | 303(2)                                                                             | 306(2)                                                                             | 303(2)                                                                             |
| Wavelength (Å)                                                                                             | 0.71073                                                                            | 0.71073                                                                            | 0.71073                                                                            |
| $a$ (Å)                                                                                                    | 18.4125(10)                                                                        | 18.3931(12)                                                                        | 18.3854(4)                                                                         |
| $b$ (Å)                                                                                                    | 6.9080(3)                                                                          | 6.9087(5)                                                                          | 6.9070(2)                                                                          |
| $c$ (Å)                                                                                                    | 18.5353(10)                                                                        | 18.5133(12)                                                                        | 18.5103(5)                                                                         |
| $\alpha$ (deg)                                                                                             | 90                                                                                 | 90                                                                                 | 90                                                                                 |
| $\beta$ (deg)                                                                                              | 112.0386(18)                                                                       | 112.056(2)                                                                         | 112.0906(8)                                                                        |
| $\gamma$ (deg)                                                                                             | 90                                                                                 | 90                                                                                 | 90                                                                                 |
| $V$ (Å <sup>3</sup> )                                                                                      | 2185.31(19)                                                                        | 2180.4(3)                                                                          | 2178.03(10)                                                                        |
| $Z$                                                                                                        | 4                                                                                  | 4                                                                                  | 4                                                                                  |
| $D_c$ (g cm <sup>-3</sup> )                                                                                | 2.454                                                                              | 2.425                                                                              | 2.389                                                                              |
| $F(000)$                                                                                                   | 1552.0                                                                             | 1535.0                                                                             | 1516.0                                                                             |
| $\theta_{\text{min,max}}$ (°)                                                                              | 3.18-27.49                                                                         | 3.18-27.49                                                                         | 3.18-27.48                                                                         |
| GOF                                                                                                        | 1.080                                                                              | 1.053                                                                              | 1.088                                                                              |
| $R_1,^a wR_2^b [I > 2\sigma(I)]$                                                                           | 0.0171, 0.0404                                                                     | 0.0202, 0.0495                                                                     | 0.0229, 0.0614                                                                     |
| $^a R_1 = \sum   F_o  -  F_c /\sum  F_o . ^b wR_2 = \{\sum [w(F_o^2 - F_c^2)^2]/\sum [w(F_o^2)^2]\}^{1/2}$ |                                                                                    |                                                                                    |                                                                                    |



**Continue Table S3**

| compound                                                                                                   | Eu <sub>0.56</sub> Y <sub>0.44</sub> -PTC                                                           | Eu <sub>0.425</sub> Y <sub>0.575</sub> -PTC                                                         | Eu <sub>0.34</sub> Y <sub>0.66</sub> -PTC                                                           |
|------------------------------------------------------------------------------------------------------------|-----------------------------------------------------------------------------------------------------|-----------------------------------------------------------------------------------------------------|-----------------------------------------------------------------------------------------------------|
| empirical formula                                                                                          | C <sub>16</sub> H <sub>16</sub> Eu <sub>1.12</sub> N <sub>2</sub> O <sub>18</sub> Y <sub>0.88</sub> | C <sub>16</sub> H <sub>16</sub> Eu <sub>0.85</sub> N <sub>2</sub> O <sub>18</sub> Y <sub>1.15</sub> | C <sub>16</sub> H <sub>16</sub> Eu <sub>0.68</sub> N <sub>2</sub> O <sub>18</sub> Y <sub>1.32</sub> |
| $F_w$ (g mol <sup>-1</sup> )                                                                               | 772.74                                                                                              | 755.72                                                                                              | 745.00                                                                                              |
| crystal system                                                                                             | monoclinic                                                                                          | monoclinic                                                                                          | monoclinic                                                                                          |
| space group                                                                                                | $P2_1/n$                                                                                            | $P2_1/n$                                                                                            | $P2_1/n$                                                                                            |
| crystal color                                                                                              | colorless                                                                                           | colorless                                                                                           | colorless                                                                                           |
| crystal size                                                                                               | 0.3×0.2×0.1                                                                                         | 0.3 × 0.2 × 0.1                                                                                     | 0.3 × 0.2 × 0.1                                                                                     |
| temperature (K)                                                                                            | 301(2)                                                                                              | 273(2)                                                                                              | 301(2)                                                                                              |
| Wavelength (Å)                                                                                             | 0.71073                                                                                             | 0.71073                                                                                             | 0.71073                                                                                             |
| $a$ (Å)                                                                                                    | 18.356(3)                                                                                           | 18.3578(7)                                                                                          | 18.3663(7)                                                                                          |
| $b$ (Å)                                                                                                    | 6.8895(13)                                                                                          | 6.9013(3)                                                                                           | 6.8962(3)                                                                                           |
| $c$ (Å)                                                                                                    | 18.502(3)                                                                                           | 18.4646(8)                                                                                          | 18.4474(7)                                                                                          |
| $\alpha$ (deg)                                                                                             | 90                                                                                                  | 90                                                                                                  | 90                                                                                                  |
| $\beta$ (deg)                                                                                              | 112.176(7)                                                                                          | 112.1571(11)                                                                                        | 112.1762(14)                                                                                        |
| $\gamma$ (deg)                                                                                             | 90                                                                                                  | 90                                                                                                  | 90                                                                                                  |
| $V$ (Å <sup>3</sup> )                                                                                      | 2166.8(7)                                                                                           | 2166.58(16)                                                                                         | 2163.67(15)                                                                                         |
| $Z$                                                                                                        | 4                                                                                                   | 4                                                                                                   | 4                                                                                                   |
| $D_c$ (g cm <sup>-3</sup> )                                                                                | 2.369                                                                                               | 2.317                                                                                               | 2.287                                                                                               |
| $F(000)$                                                                                                   | 1500.0                                                                                              | 1474.0                                                                                              | 1457.0                                                                                              |
| $\theta_{\min, \max}$ (°)                                                                                  | 3.18-27.55                                                                                          | 3.18-27.51                                                                                          | 3.18-27.49                                                                                          |
| GOF                                                                                                        | 1.092                                                                                               | 1.135                                                                                               | 1.107                                                                                               |
| $R_1,^a wR_2^b [I > 2\sigma(I)]$                                                                           | 0.0309, 0.0757                                                                                      | 0.0331, 0.0897                                                                                      | 0.0283, 0.0778                                                                                      |
| $^a R_1 = \sum   F_o  -  F_c /\sum  F_o . ^b wR_2 = \{\sum [w(F_o^2 - F_c^2)^2]/\sum [w(F_o^2)^2]\}^{1/2}$ |                                                                                                     |                                                                                                     |                                                                                                     |

**Continue Table S3**

| compound                                                                                                       | Eu <sub>0.30</sub> Y <sub>0.70</sub> -PTC                                                           | Eu <sub>0.21</sub> Y <sub>0.79</sub> -PTC                                                           | Eu <sub>0.08</sub> Y <sub>0.92</sub> -PTC                                                           |
|----------------------------------------------------------------------------------------------------------------|-----------------------------------------------------------------------------------------------------|-----------------------------------------------------------------------------------------------------|-----------------------------------------------------------------------------------------------------|
| empirical formula                                                                                              | C <sub>16</sub> H <sub>16</sub> Eu <sub>0.60</sub> N <sub>2</sub> O <sub>18</sub> Y <sub>1.40</sub> | C <sub>16</sub> H <sub>16</sub> Eu <sub>0.42</sub> N <sub>2</sub> O <sub>18</sub> Y <sub>1.58</sub> | C <sub>16</sub> H <sub>16</sub> Eu <sub>0.16</sub> N <sub>2</sub> O <sub>18</sub> Y <sub>1.84</sub> |
| $F_w$ (g mol <sup>-1</sup> )                                                                                   | 739.96                                                                                              | 728.61                                                                                              | 712.22                                                                                              |
| crystal system                                                                                                 | monoclinic                                                                                          | monoclinic                                                                                          | monoclinic                                                                                          |
| space group                                                                                                    | <i>P2<sub>1</sub>/n</i>                                                                             | <i>P2<sub>1</sub>/n</i>                                                                             | <i>P2<sub>1</sub>/n</i>                                                                             |
| crystal color                                                                                                  | colorless                                                                                           | colorless                                                                                           | colorless                                                                                           |
| crystal size                                                                                                   | 0.3×0.2×0.1                                                                                         | 0.3 × 0.2 × 0.1                                                                                     | 0.3 × 0.2 × 0.1                                                                                     |
| temperature (K)                                                                                                | 301(2)                                                                                              | 273(2)                                                                                              | 301(2)                                                                                              |
| Wavelength (Å)                                                                                                 | 0.71073                                                                                             | 0.71073                                                                                             | 0.71073                                                                                             |
| <i>a</i> (Å)                                                                                                   | 18.329(4)                                                                                           | 18.3456(16)                                                                                         | 18.3352(9)                                                                                          |
| <i>b</i> (Å)                                                                                                   | 6.8971(18)                                                                                          | 6.8867(6)                                                                                           | 6.8838(4)                                                                                           |
| <i>c</i> (Å)                                                                                                   | 18.442(4)                                                                                           | 18.3909(16)                                                                                         | 18.3844(9)                                                                                          |
| $\alpha$ (deg)                                                                                                 | 90                                                                                                  | 90                                                                                                  | 90                                                                                                  |
| $\beta$ (deg)                                                                                                  | 112.200(9)                                                                                          | 112.165(3)                                                                                          | 112.22                                                                                              |
| $\gamma$ (deg)                                                                                                 | 90                                                                                                  | 90                                                                                                  | 90                                                                                                  |
| <i>V</i> (Å <sup>3</sup> )                                                                                     | 2158.6(8)                                                                                           | 2151.8(3)                                                                                           | 2148.16(19)                                                                                         |
| <i>Z</i>                                                                                                       | 4                                                                                                   | 4                                                                                                   | 4                                                                                                   |
| <i>D<sub>c</sub></i> (g cm <sup>-3</sup> )                                                                     | 2.277                                                                                               | 2.249                                                                                               | 2.202                                                                                               |
| <i>F</i> (000)                                                                                                 | 1450.0                                                                                              | 1432.0                                                                                              | 1407.0                                                                                              |
| $\theta_{\min, \max}$ (°)                                                                                      | 3.18-27.49                                                                                          | 1.99-27.55                                                                                          | 3.19-27.50                                                                                          |
| GOF                                                                                                            | 1.052                                                                                               | 1.073                                                                                               | 1.087                                                                                               |
| $R_1, {}^a wR_2^b [I > 2\sigma(I)]$                                                                            | 0.0338, 0.0848                                                                                      | 0.0313, 0.0827                                                                                      | 0.0246, 0.0611                                                                                      |
| ${}^a R_1 = \sum   F_o  -  F_c /\sum  F_o . {}^b wR_2 = \{\sum [w(F_o^2 - F_c^2)^2]/\sum [w(F_o^2)^2]\}^{1/2}$ |                                                                                                     |                                                                                                     |                                                                                                     |

**Continue Table S3**

| compound                            | Eu <sub>0.06</sub> Y <sub>0.94</sub> -PTC                                                           | Eu <sub>0.013</sub> Y <sub>0.987</sub> -PTC                                                           |
|-------------------------------------|-----------------------------------------------------------------------------------------------------|-------------------------------------------------------------------------------------------------------|
| empirical formula                   | C <sub>16</sub> H <sub>16</sub> Eu <sub>0.12</sub> N <sub>2</sub> O <sub>18</sub> Y <sub>1.88</sub> | C <sub>16</sub> H <sub>16</sub> Eu <sub>0.026</sub> N <sub>2</sub> O <sub>18</sub> Y <sub>1.974</sub> |
| $F_w$ (g mol <sup>-1</sup> )        | 709.69                                                                                              | 704.02                                                                                                |
| crystal system                      | monoclinic                                                                                          | monoclinic                                                                                            |
| space group                         | $P2_1/n$                                                                                            | $P2_1/n$                                                                                              |
| crystal color                       | colorless                                                                                           | colorless                                                                                             |
| crystal size                        | 0.3 × 0.2 × 0.1                                                                                     | 0.3 × 0.2 × 0.1                                                                                       |
| temperature (K)                     | 273(2)                                                                                              | 296(2)                                                                                                |
| Wavelength (Å)                      | 0.71073                                                                                             | 0.71073                                                                                               |
| $a$ (Å)                             | 18.3079(4)                                                                                          | 18.3115(5)                                                                                            |
| $b$ (Å)                             | 6.8784(2)                                                                                           | 6.8759(1)                                                                                             |
| $c$ (Å)                             | 18.3684(4)                                                                                          | 18.3669(4)                                                                                            |
| $\alpha$ (deg)                      | 90                                                                                                  | 90                                                                                                    |
| $\beta$ (deg)                       | 112.1963(8)                                                                                         | 112.2217(9)                                                                                           |
| $\gamma$ (deg)                      | 90                                                                                                  | 90                                                                                                    |
| $V$ (Å <sup>3</sup> )               | 2166.58(16)                                                                                         | 2140.82(8)                                                                                            |
| $Z$                                 | 4                                                                                                   | 4                                                                                                     |
| $D_c$ (g cm <sup>-3</sup> )         | 2.201                                                                                               | 2.184                                                                                                 |
| $F(000)$                            | 1404.0                                                                                              | 1395.0                                                                                                |
| $\theta_{\min, \max}$ (°)           | 3.19-27.50                                                                                          | 3.19-27.49                                                                                            |
| GOF                                 | 1.051                                                                                               | 1.078                                                                                                 |
| $R_1, {}^a wR_2^b [I > 2\sigma(I)]$ | 0.0251, 0.0563                                                                                      | 0.0284, 0.0581                                                                                        |

<sup>a</sup>  $R_1 = \sum ||F_o| - |F_c| / \sum |F_o|$ . <sup>b</sup>  $wR_2 = \{ \sum [w(F_o^2 - F_c^2)^2] / \sum [w(F_o^2)^2] \}^{1/2}$

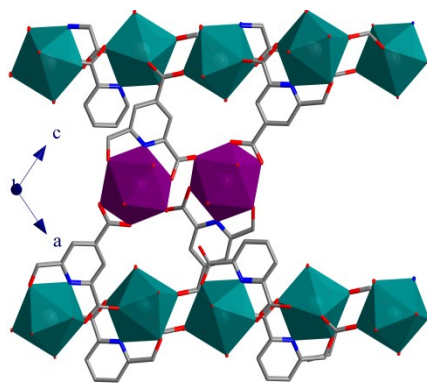

**Figure S1:** The connection of Eu1 (purple) and Eu2 (green) in Eu-PTC.

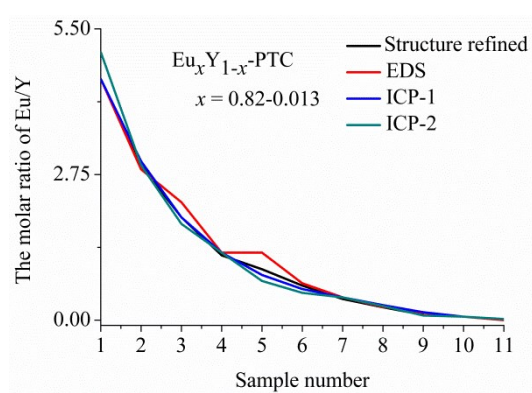

**Figure S2:** Molar ratio of Eu:Y =  $x$ : (1- $x$ ) in  $\text{Eu}_x\text{Y}_{1-x}$ -PTC. (Samples 1–11 represent  $x = 0.82\text{--}0.013$ )

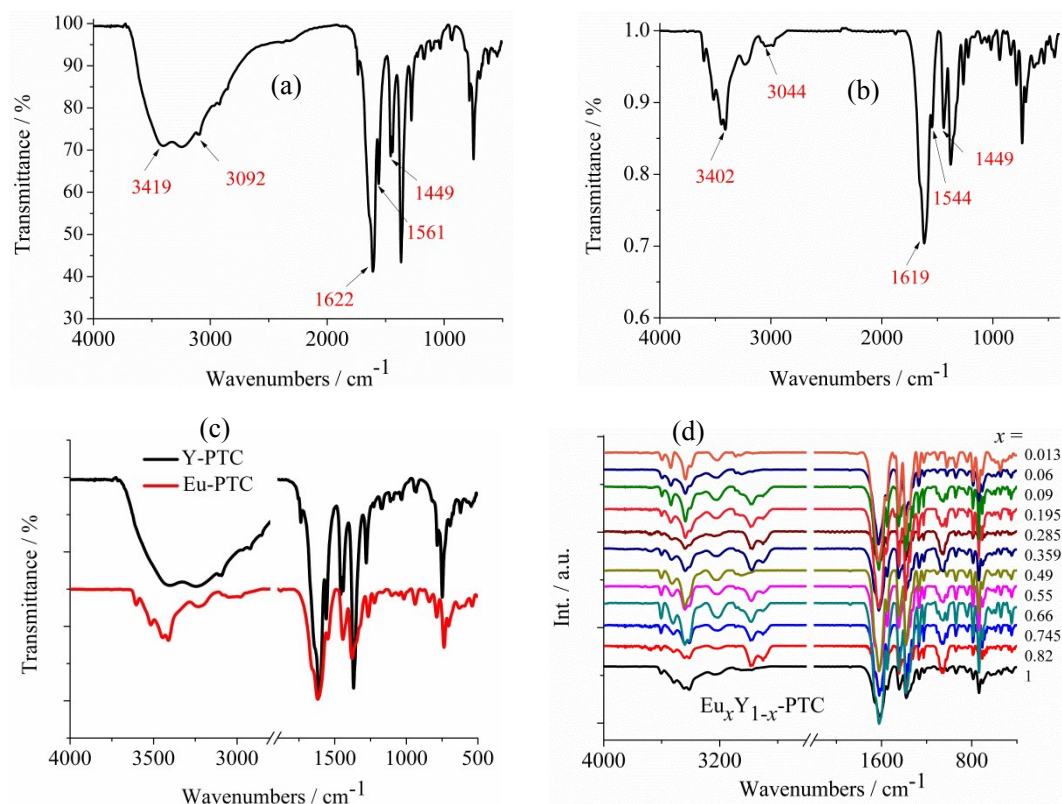

**Figure S3:** IR spectra of (a) Y-PTC (b) Eu-PTC (c) Y-PTC and Eu-PTC (d)  $\text{Eu}_x\text{Y}_{1-x}\text{-PTC}$  ( $x = 0.013\text{--}1$ ).

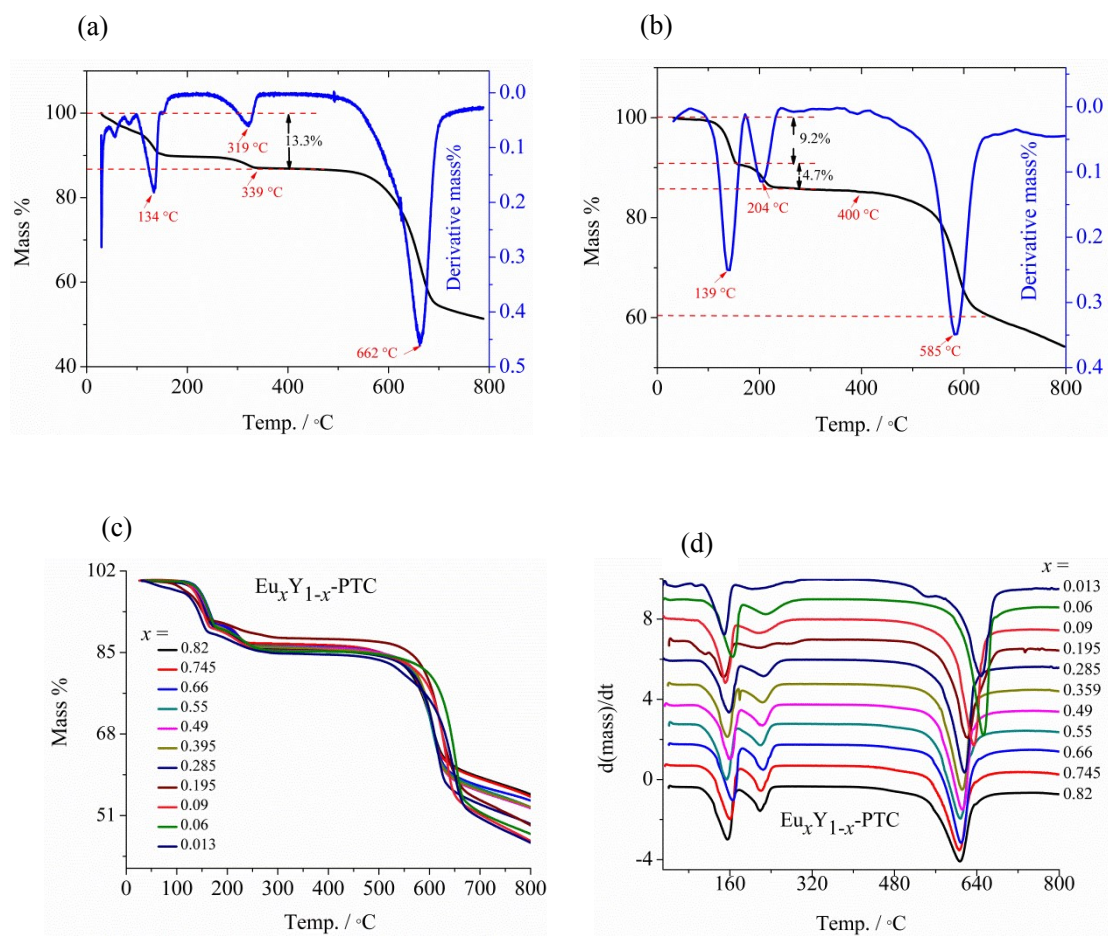

**Figure S4:** TG and DTA curves of (a)Y-PTC (b)Eu-PTC (c, d)  $\text{Eu}_x\text{Y}_{1-x}$ -PTC ( $x = 0.013\text{--}0.82$ ).

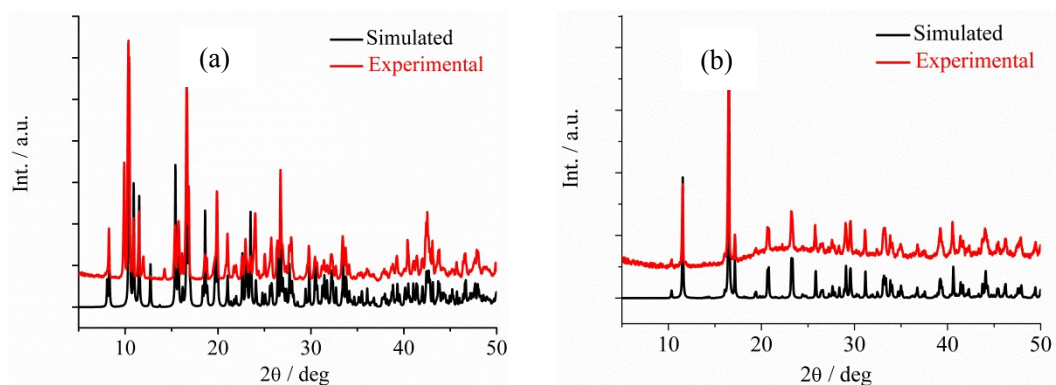

**Figure S5:** The powder X-ray diffraction patterns for (a) Y-PTC (b) Eu-PTC. (a)

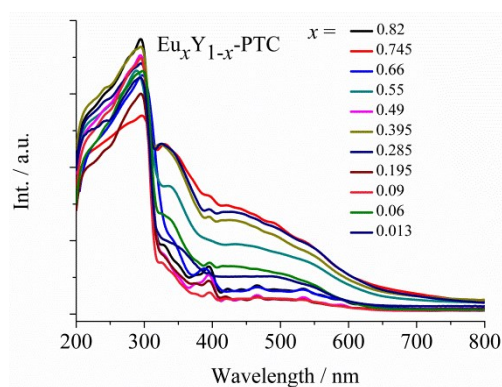

**Figure S6:** Solid-state UV-vis diffuse reflectance spectra of  $\text{Eu}_x\text{Y}_{1-x}\text{-PTC}$  ( $x = 0.013\text{--}0.82$ ).

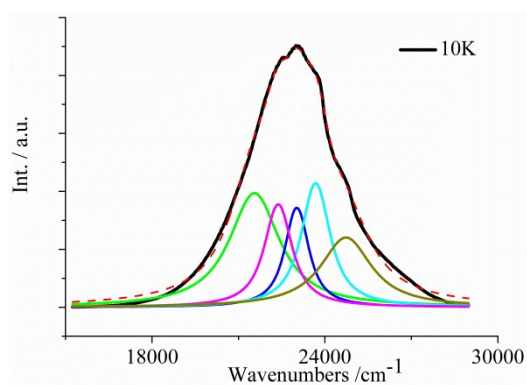

**Figure S7:** The fine structure of solid-state emission spectra for Y-PTC at 10K excited under UV light at 326 nm.

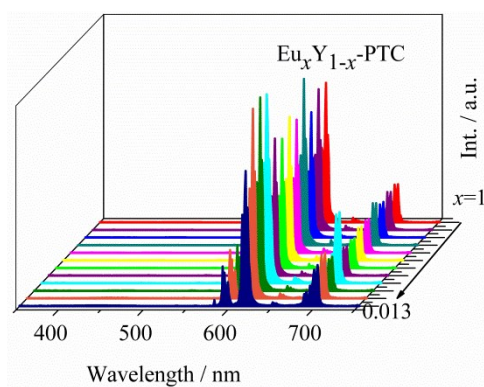

**Figure S8:** Eu<sub>x</sub>Y<sub>1-x</sub>-PTC ( $x = 0.013-1$ ) under optimal excitation light with  $\lambda = 301$  nm at room temperature.

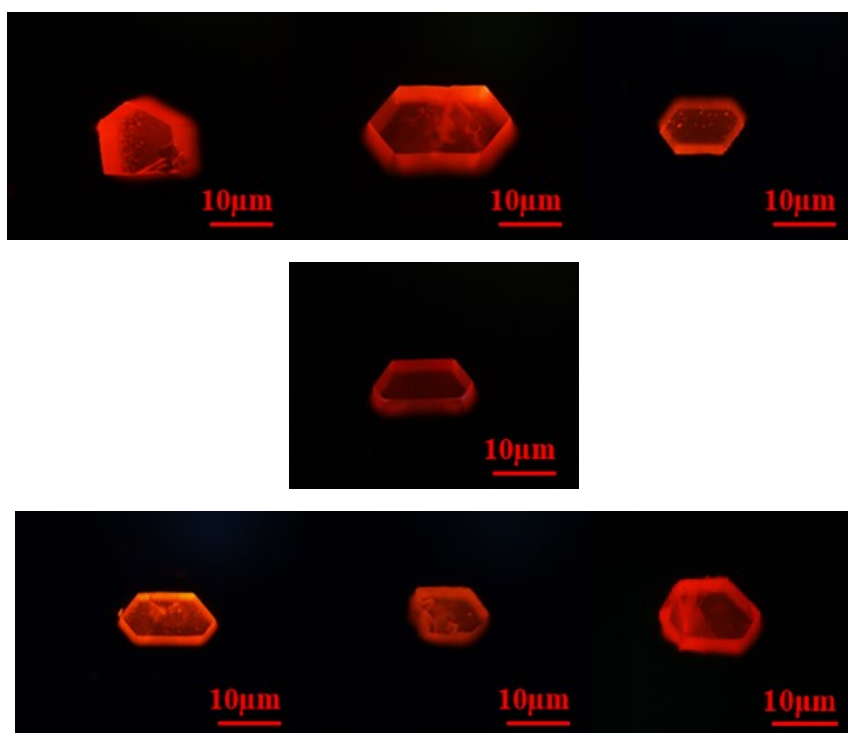

**Figure S9:** Images of crystals under UV light (300–380 nm) for Eu<sub>x</sub>Y<sub>1-x</sub>-PTC ( $x = 0.395-1$ ).



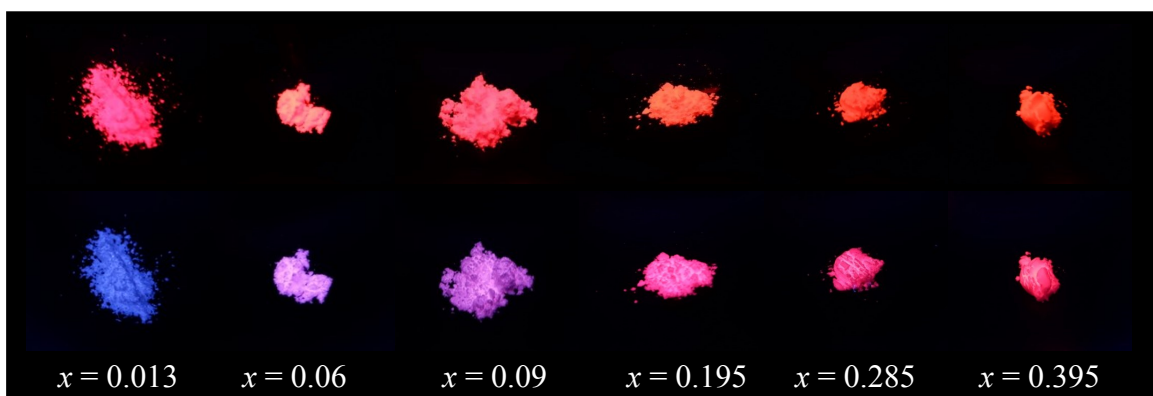

**Figure S10:** Photographs of  $\text{Eu}_x\text{Y}_{1-x}\text{-PTC}$  under UV light (upper row,  $\lambda_{\text{ex}} = 254 \text{ nm}$  and lower row,  $\lambda_{\text{ex}} = 365 \text{ nm}$ ) showing different colors owing to the emission spectra being dependent on excited wavelength.

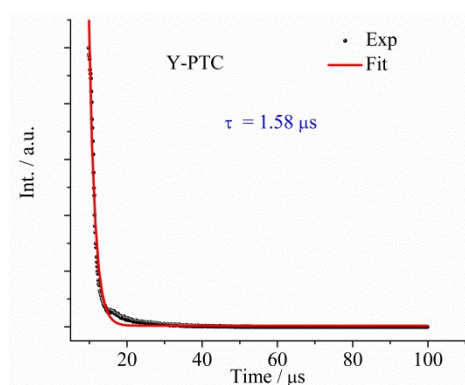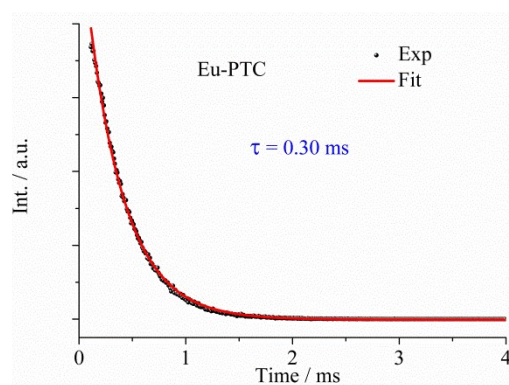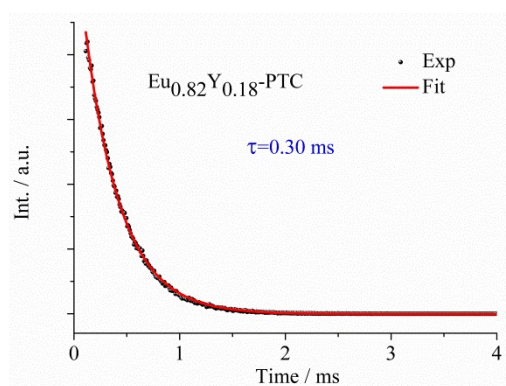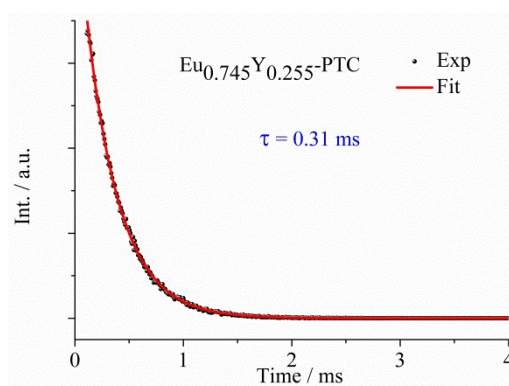

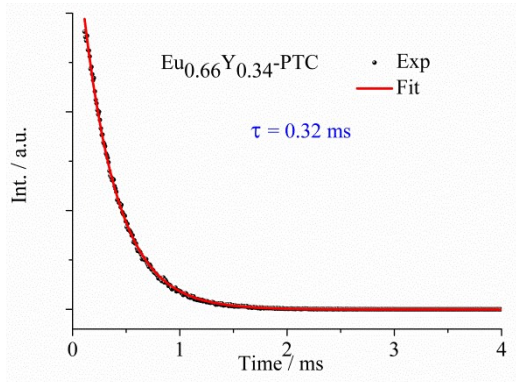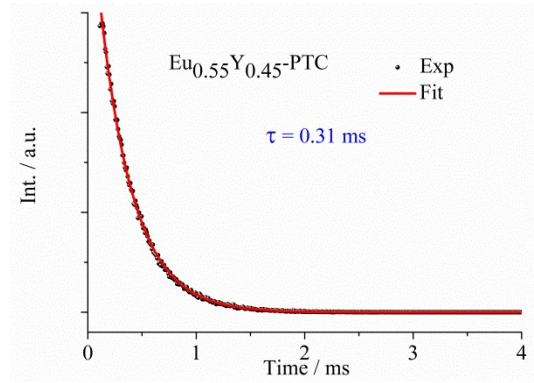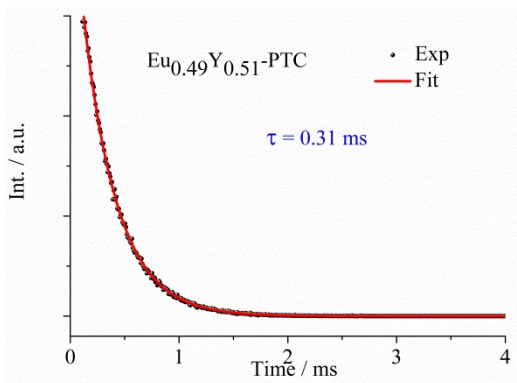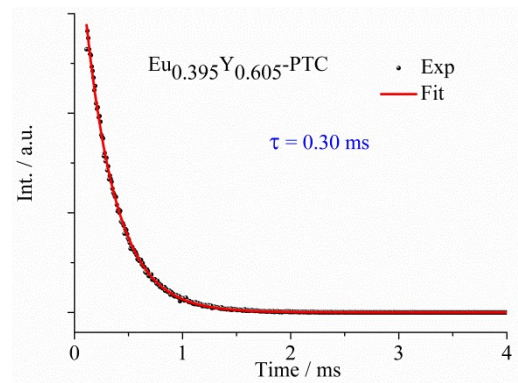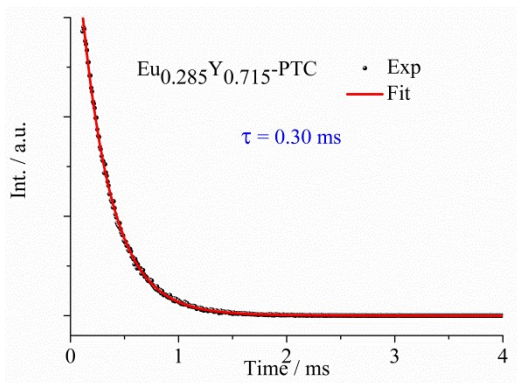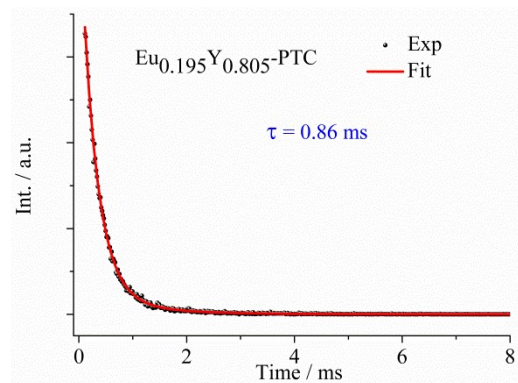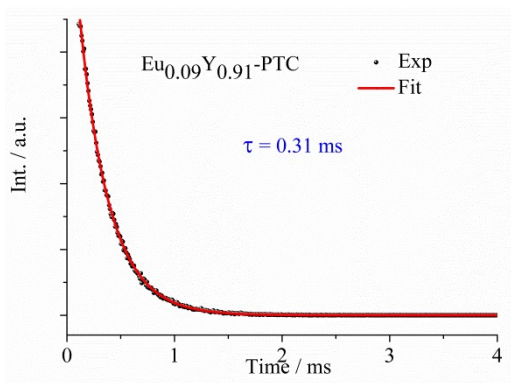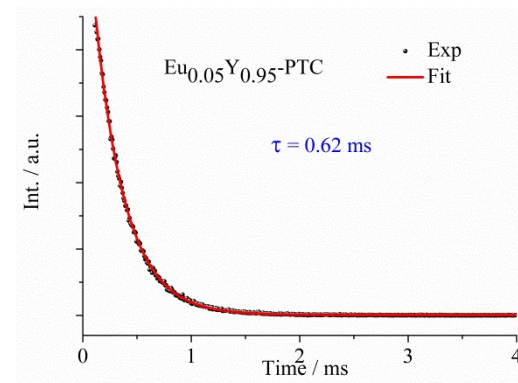

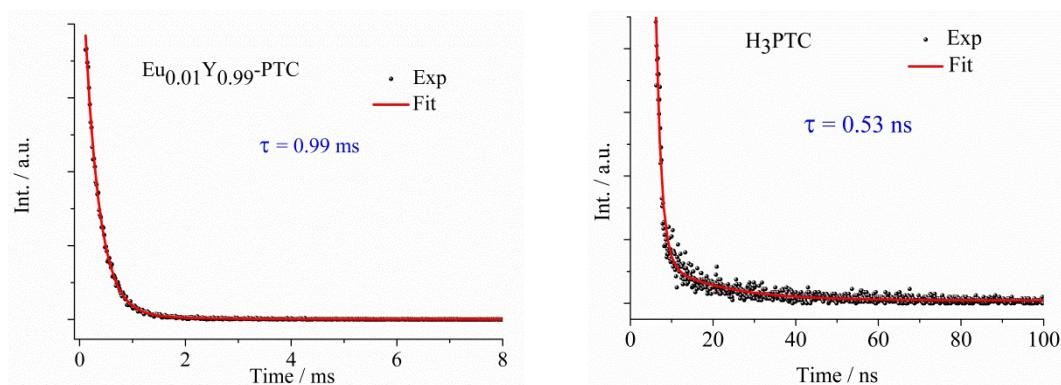

**Figure S11:** Emission decay of H<sub>3</sub>PTC and all MOFs obtained at room temperature, where the red lines and the black squares represent the fitting curves and the experimental data, respectively.

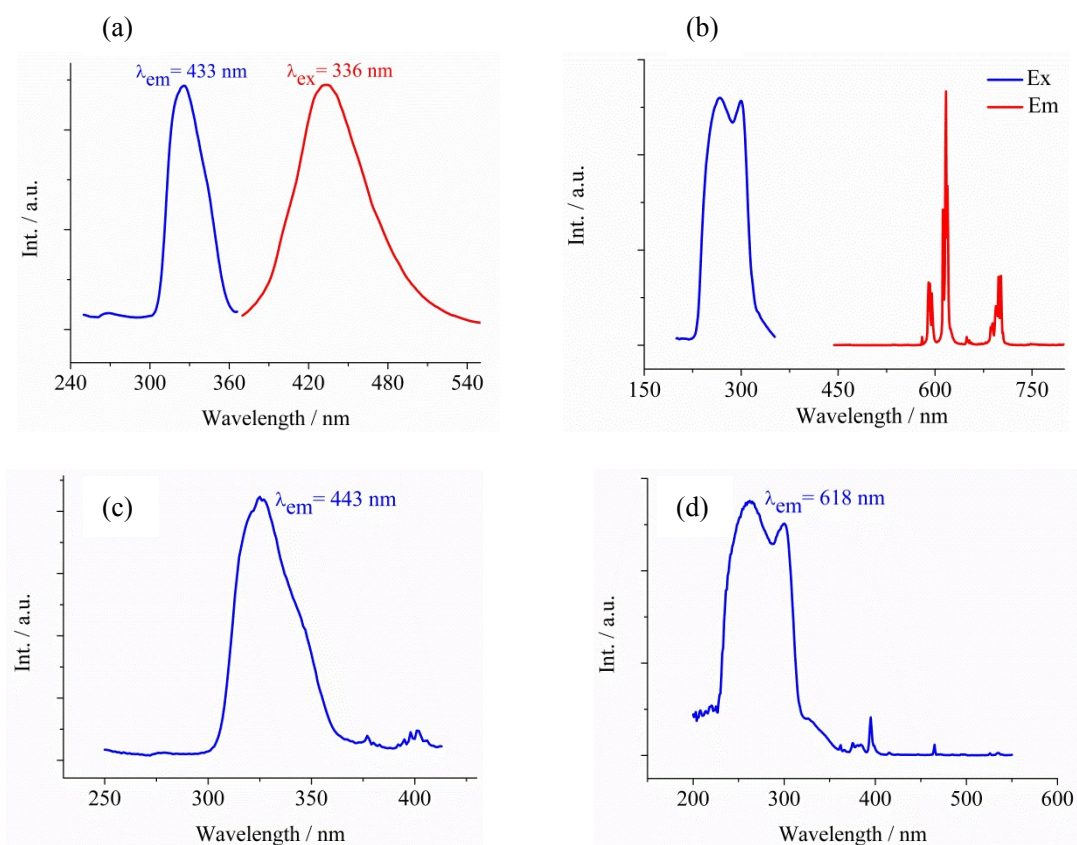

**Figure S12:** Excitation and emission spectra of (a) Y-PTC (b) Eu-PTC at ambient condition, excitation spectrum of Eu<sub>0.06</sub>Y<sub>0.94</sub>-PTC (c) examined at 443 nm (d) examined at 618 nm.
